# Supplementary material for: Contribution of satellite sea surface salinity to the estimation of liquid freshwater content in the Beaufort Sea
Source: Copernicus journal article supplement (doi:10.5194/egusphere-2023-1510), 2023-07-07
Supplement: Supplementary file [file egusphere-2023-1510-AC1-supplement.pdf]

## Reply on RC1

*Thank you for your careful and insightful review, all your suggestions have been addressed.*

### Review

I conducted a thorough review of the manuscript titled "Contribution of satellite sea surface salinity to the estimation of liquid freshwater content in the Beaufort Sea" by Marta Umberto et al.

In summary, these findings highlight that the incorporation of SMOS SSS data while employing TOPAS4b reanalysis data into the calculation of freshwater content in the Beaufort Gyre region during 2011-2019 summer months. Three different depths were used to combine SMOS SSS in freshwater content (FWC) depending on a constant mixed layer depth which significantly enhances the accuracy of FWC estimates. This enhancement is manifested through the reduction of bias, an increased slope, and improved coefficient of determination when compared to in-situ estimates.

### General Recommendations:

- Maintain consistency in the use of "in-situ" terminology, either hyphenated without italics or not hyphenated with italics, as long as it is applied uniformly throughout.

*Done*

- Strive for conciseness and directness in many areas of the text. Specific values can replace vague sentences to enhance precision.

*Done*

- Clarify a major concern regarding the measurement of freshwater content. It should be noted that mixed layer depth can be calculated, and the study is concerned with the amount of freshwater within this depth while testing different constant MLD values. The justification for this approach, represented by adding SMOS SSS data up to 16 m (green line), 25 m (orange line), and up to 29 m (blue line), should be provided. Additionally, address the potential for overestimation of FWC due to SMOS measurements being confined to the melting season, which can create a freshwater film at the surface.

*Certainly, as the reviewer points out, the calculation of Mixed Layer Depth (MLD) can be performed using in-situ profiles. However, for the calculation of FWC, we employ TOPAZ4 system that uses fixed depth levels. We use bibliographic estimates of typical MLD depths for the time of year and study area and conduct three experiments using the nearest fixed levels to these bibliographic MLDs. Through these three experiments, we can assess the uncertainty associated with the spatiotemporal variability of MLD. This is outlined in subsection 2.4.*

*We believe that we are not overestimating FWC. Instead, we think that the SMOS data introduce FWC originating from melting that is not accounted in TOPAZ4 system. When we provide an annual estimate of FWC (Figure 6), we specify that it only represents the mean for the months from July to October.*

- I have reservations to these results, one of which is related to alias biasing of in-situ data based on their horizontal and vertical resolution. The FWC product is integrated which can introduce more bias and thus may not represent 'true FWC' without further explanation of the product or related works. Emphasize that the estimation of FWC remains subject to limitations when insufficient data is available, as comparisons to direct in-situ

measurements allows for validation of salinity but not the integration of freshwater.- Acknowledge concerns about the region tested, particularly the influence of downwelling on freshwater accumulation, which could be the reason for the improvement using SMOS SSS to 29 m depth. Concluding that combining SMOS SSS and reanalysis data could enhance the entire Arctic's FWC should be cautioned as this has not been tested in your research while it may be a useful avenue for future exploration.

*Thank you for your input, we have introduced your points in the manuscript:*

*Section 3.2. 'It is worth considering that FWC estimates based on in-situ data also come with inherent biases, influenced by their horizontal and vertical resolution (Proshutinsky et al., 2009). The estimation of FWC remains an ongoing research topic due to the limitations posed by the scarcity of in-situ data available for producing these estimates.'*

*Section 3.2. 'A potential explanation for the higher improvement observed when using SMOS SSS data down to the 29-meter level, as opposed to the other experiments, could be associated with the impact of downwelling on freshwater accumulation in the Beaufort Gyre.'*

*Conclusions. 'This integrated approach could allow for the identification of patterns, trends, and anomalies in SSS, which can provide valuable insights into the drivers and impacts of freshwater changes in the Beaufort region, and hold promise for future exploration in the broader Arctic within the context of climate change and global ocean dynamics.'*

#### Abstract

Authors specify their use of satellite data to better assess SSS in the Arctic. Such retrievals are known to have substantial limitations and large errors near the sea ice edge and in cold waters due to the L-band retrievals becoming less sensitive to salinity at cold sea surface temperatures. *In the abstract the authors state that: 'new satellite retrievals of Sea Surface Salinity MIGHT contribute to better characterizing the freshwater changes in cold regions'*

Can the authors justify this in text?

*The limitations of SSS in the Arctic are stated and referenced (Olmedo et al 2018 and Xie et al 2019) in the introduction.*

Line 4: "Sea Surface Salinity" does not need capitalization

*Done*

Line 5-6 "That is because... increase/decrease of one entails a decrease/increase of the other." The authors should specify this point for clarity. As in "an increase (decrease) of salinity entails a decrease (increase) of freshwater content". "That is because" is not needed.

*Done*

Line 8: Specify type of reanalysis product you are using as your study does not analyze more than one reanalysis product.

*Done*

Line 11: "The improvements are significant, especially in areas close to ice melting."

Too vague, give a more quantitative value from results to back this.

*Thank you, we have added 'The improvements are significant, with up to a 70% reduction in bias in areas near the ice melting'*

Line 13-14: "Our research demonstrates....that regulates Earth's Climate."

This sentence should be rewritten for clarity. Some areas are vague ("a key process", which one?) and the research does not address the implications towards the global circulation system

that regulates the Earth's Climate. Add further details in the introduction to justify this connection.

*The key process that we mean is the changing freshwater content in the Arctic system due to glacier melting, increase river discharges and accumulation in the Beaufort Gyre.*

*The phrase now reads as: 'Our research demonstrates how remotely sensed salinity can assist us in better monitoring the changes in the Arctic freshwater content and improving our understanding this key process that is creating subtle density differences that have the potential to change ocean global circulation system that regulates Earth's Climate.'*

*We have added the following to the introduction: 'Changes in the Arctic hydrography directly affect conditions on the rest of the planet through feedback mechanisms and interactions with the northern hemispheric atmospheric circulation. The retreating sea ice cover and an associated warmer and fresher upper ocean have a direct effect on intensifying the stratification of the water column, with the potential to destabilize the thermohaline circulation, which regulates the Earth's Climate (Rahmstorf et al., 2002).'*

### Introduction

- Address the significance of atmospheric conditions and climate patterns in relation to the retention of FWC in the Beaufort Gyre, which currently lacks explanation in the introduction.

*We have added this information in the following paragraph of the introduction:*

*'At the western side of the Arctic climate system lies the Beaufort Gyre, a large swirling circulation cell in the Beaufort Sea. The BG's rotation is driven by anticyclonic (clockwise) wind stress caused by a high-pressure system in the lower atmosphere. The gyre contains an enormous reservoir of sea ice and freshwater from northern rivers (mainly Mackenzie and Yukon) and the Bering Strait (Proshutinsky et al., 2015; Armitage et al., 2020). The shape and extension of the BG's is driven by weather patterns such as Arctic Oscillation (AO) and has a marked seasonal variability. Within the BG, freshwater accumulates through Ekman convergence, ultimately making its exit from the Arctic through the Davis and Fram Straits. Since 1997, high atmospheric pressure has triggered strong anticyclonic winds over the Beaufort Gyre (Lenton et al., 2019) which lead to an increase of FWC by 40% in the last two decades (McPhee et al., 2009; Solomon et al., 2021).*

*The variability of freshwater fluxes from the Arctic has the potential of collapsing subpolar North Atlantic convection, resulting in rapid North Atlantic cooling (Holliday et al., 2020) that would affect global climate via the thermohaline circulation (Rahmstorf, 2000; Zhang et al., 2021; Arthun et al., 2023), as well as the ocean heat content and biogeochemical cycles (Li et al., 2009). The timing and consequences of the eventual release of the accumulated freshwater into the Beaufort Gyre into the North Atlantic remain unclear and warrant further investigation.'*

- It might be best to describe what liquid freshwater content is since its not just a layer of freshwater on top of salt water, but a ratio of salt content that is lower than a certain standard. The salinity reference is also not agreed upon between scientists and may need to be defended on your part for why you chose that salinity reference (simply stating that you match the salinity reference with Proshutinsky et al. (2009) as you compare your results to their gridded FWC. It would also be beneficial to clarify the concept of FWC within the context of the Arctic. Emphasize that "freshwater" does not necessarily mean complete

absence of salinity; there exists a salinity threshold that varies in Arctic research.

*We have introduced the following phrase: 'The freshwater is defined as the amount of zero-salinity water that is contained in a volume of water relative to a reference salinity. Liquid freshwater content (FWC) is the depth integral of freshwater, expressed in length units. We chose the salinity reference used in Proshutinsky et al., 2009 as we will compare our estimations with their gridded in-situ estimates.'*

Line 17: Be more specific, the Arctic has experienced rapid changes more than just recent years, it has arguably been occurring over decades or at least since 2007. This statement could be improved by adding specific rate or timeframe that would enhance the importance of Arctic changes.

*We have changed the line by 'rapid changes in the last decades'*

Line 21: "(referred to as FWC)"

Change to "(FWC)"

*Done*

Line 23: Please provide a references for these contributions of FWC as it may differ between time periods or methodologies.

*Done, we have included the reference to Timmermans and Toole, 2023.*

Line 28: This sentence is a bit misleading, the Beaufort Gyre itself isn't necessarily at the 'heart' of the Arctic's climate, its highly influenced by climatic systems and atmospheric processes. It is also located in the Beaufort Sea and may extend northward but this statement makes it sound like it is not in the Beaufort Sea.

*We have rephrased as: 'At the western side of the Arctic'.*

*We have rephrased as 'in the Beaufort Sea'.*

Line 29-30: This is a personal opinion but will clarify for the reader: "...strong anticyclonic (counterclockwise) winds...powerful cyclonic (clockwise) circulation".

*We have rephrased the paragraph, now it reads as 'The BG's rotation is driven by anticyclonic (clockwise) wind stress caused by a high-pressure system in the lower atmosphere'*

Line 32-33: This transition between sentences seems random, you started introducing the Beaufort Gyre then talk about the Arctic's freshwater flux influence on a global scale without stating how. You could emphasize that the Beaufort Gyre consists of a large portion of the entire

Arctic Ocean's FWC and where the connection is between the Arctic and the thermohaline circulation comes in.

*You are right, sorry for the confusion. We have rewritten the entire paragraph.*

Line 35: I'm assuming "change" could be clarified as "increase"? This sentence also seems random and would benefit with explanation of the importance of the time between 2012 and 2016.

*Same as before, we have rewritten the paragraph.*

Line 40: Only within the last decade (2013-2023)? Also, is sea surface height capitalized for a reason?

*Changed to: 'In the last decades, satellite data such as altimetry (e.g. sea surface height from CryoSat-2)..'*

Line 47-49: It would be much simpler to state that FWC is the integral of salinity differences between measurement and a constant. I understand the way you are introducing different ways of measuring FWC but you don't describe what FWC really is upfront. This paragraph can be conveyed more directly and concise.

*As stated in previous comment, we have introduced an explanation of FWC: 'The freshwater is defined as the amount of zero-salinity water that is contained in a volume of water relative to a reference salinity. Liquid freshwater content (FWC) is the depth integral of freshwater, expressed in length units. We chose the salinity reference used in Proshutinsky et al., 2009 as we will compare our estimations with their gridded in-situ estimates'*

Line 56-57: One-day repeat cycle does not seem accurate. Data can be generated at daily intervals, but that is not the same as a satellite's repeat cycle. Typically, its 3-8 days unless you can clarify what you mean. I also believe Aquarius's spatial resolution is much greater. The repeat cycle of SMOS in the Arctic is

*We have rephrased as: 'The SMOS satellite provides daily full coverage in polar regions with an effective spatial resolution of 50 km in the seasonally ice-free areas of the Arctic Ocean.'*

Line 62: Change "sea surface salinity" to "SSS". Also in lines 70, 228.

*Done*

Line 86: Change "resolution" to "spatial resolution"

*Done*

Line 90: "ranging from surface to bottom". Can you be more specific on what 'surface' is in meters?

*We have rephrased: 'ranging from surface (zero meters) to bottom.'*

Data

Line 70: State the level of the satellite product (level 3 product?)

*Done*

Line 71: Specify month and year range of SMOS data and which timeframe you took the data from here.

*Done*

Line 80-81: You use the OSI-SAF acronym then the name but should it come after "Ocean and Sea Ice Satellite Application Facility" in parenthesis?

*Changed*

Line 96: Change "sea ice concentration" to SIC. Also in line 139.

*Done*

Line 99: "...surface to 4000 m depth.", is this near surface or skin-surface? Might be best to note top layer in meters.

*Now it reads as: 'It has 40 hybrid vertical layers (z-isopycnal) from the surface (0 m) to 4000 m depth with resolution varying from 1 m at the surface to 1500 m at the deepest level.'*

Line 105: Do the in-situ data exceed 300 meters as well or is this referring to the region's depths exceed 300 m defined by Proshutinsky. If the latter, then clearly define the depths that the in-situ measurements cover.

*We refer at how the Beaufort Gyre area is defined. The details of in-situ measurements used to produce this FWC product is in the paper of Proshutinsky et al., 2009, and we have cited it in this subsection. For example, the ITPs used go up to 760 meters and the moorings up to 2000 meters.*

Line 109: Specify the time intervals that these data are provided or that you used (hourly, daily, monthly?)

*To clarify this part, we have included the following detail: 'They offer a yearly estimate based on those in-situ measurements from July to October.'*

Eq.1: Define equation symbols through text explanation.

*We have added: 'Where  $S$  is the salinity at each grid point,  $S_{ref}$  is the salinity reference, and  $z$  is the depth where the  $S_{ref}$  is achieved.'*

Line 121: Justify the use of 16, 25, and 29 meters for the MLD. Can you use profile data to estimate the MLD? You mention using a constant value of MLD throughout the year but are only assessing melt season, which is confusing.

*As responded in the general comment, we have added an explanation and further details in subsection 2.4.*

## Results

Line 131: As a predominantly anticyclonic gyre, isn't it more characteristic for the Beaufort Gyre to have downwelling occur instead of upwelling as this line suggests (i.e. "surfaced")? Or are you discussing waters pulled from the surrounding water or characteristics in general?

*This is a general characteristic of SMOS capability but as is misleading in this context, we decided to delete this sentence.*

Figure 1: Why these two years (2011 & 2016)? You mention the greatest and quickest change in salinity between 2012-2016, but do you choose 2011 since is the beginning of the period you are examining?

*We have chosen these two years because they were an example of clear qualitative melting signatures in SMOS SSS. We did delete the phrase concerning maximum salinity anomalies in years 2011 and 2016 as they referred to the entire Arctic region and it was confusing.*

Stating the uppermost level of TOPAS4b would be helpful in analyzing the difference between the skin-salinity that the satellite measures and the depth of what TOPAZ4b measures.

*We have already introduced the depth of first layer defined in TOPAZ4b system.*

Line 137: Should the references be in parentheses?

*Done*

Line 155-156: Repeat of the description of the Beaufort Gyre region as in lines 104-105, could further describe why you use the same region as Proshutinsky et al.

*Ok, we stated that we used the same area.*

Figure 3. Note the acronym for freshwater content and its unit in the caption (i.e. FWC [m]).

The colorbar for (c,f) seems to emphasize regions over or under a ~2psu difference, is there a

reason for this or can the colorbar be changed to detail the region and make different values clearer?

*We have changed all the captions. We decide to truncate the anomaly values higher than 3 psu to empathize the biggest contribution in areas affected by sea ice melting.*

Line 182: Parenthesis around reference.

*Done*

Line 182-184: How does TOPAZ4b assimilate variables associated with freshwater inputs? Are there estimations on its certainty to capture these signals accurately?

*TOPAZ4b used monthly climatological river inputs (as detailed in Xie et al. 2017) which were overestimated in Winter and underestimated in the Spring. The only relevant data assimilated were sea ice thickness from November 2010 onwards, but there were otherwise only sporadic salinity profiles in the area of interest.*

Section 3.2

Figure 5. Label [b] colorbar as “FWC error [m]”. Last sentence of caption is not complete.

*We have changed label of 5b. Last sentence is finished.*

Line 198: You mention “several studies” but only cite one, can you provide more studies to back this claim? Otherwise reword.

*Done*

Figure 6.: Define more reasons why there are large discrepancies in FWC between in-situ data and other products. Could in-situ be overestimating due to lack of spatiotemporal coverage? The in-situ based FWC product is integrated so this could pose it's own errors or overestimation/underestimation.

*Thank you, we have included the following phrase: ‘The reasons why in-situ estimates may overestimate FWC could be explained by the lack of spatiotemporal coverage of these measurements or by the fact that it is an integrated product with associated errors.’*

Line 228: Change “sea surface salinity (SSS)” to “SSS”

*Done*

Line 230: Change “...freshwater content..” to “FWC”

*Done*

Lines 251-252: “This integrated approach could allow for the identification of patterns, trends, and anomalies in SSS..”

*I'm not entirely sure I understand what you mean by that.*
